# Supplementary material
Source: PubMed Central journal article supplement (PMC1635518)

**C: Phylogenies dated to obtain minimum estimates of the timing of divergence of putative Cape relicts from their closest non-Cape relatives. Chronograms are presented for phylogenies dated using multidivtime. Where nodes separating putative relicts from their closest non-Cape relatives correspond to nodes of calibration, multidivtime was not needed and phylograms are presented. Nodes of calibration are numbered according to electronic supplementary material A. Dated nodes are labelled with the mean age estimate (Myr before present) from the two independent runs of the Markov chain.**

(a) *Brabejum*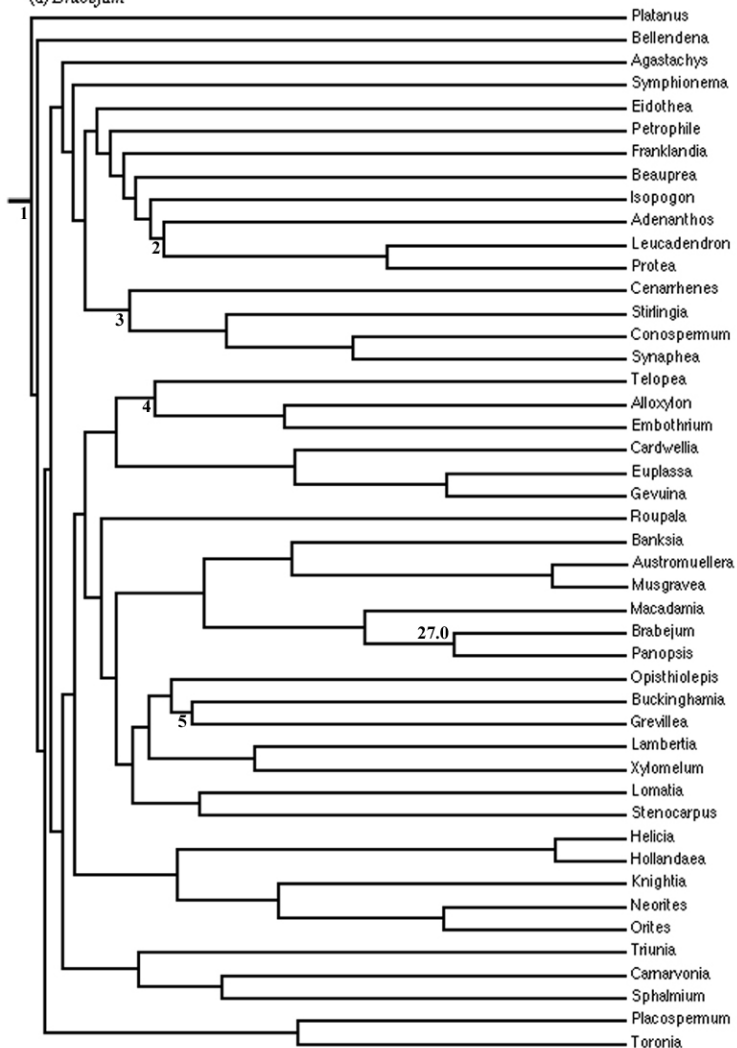

(b) *Cunonia* and *Platylophus*

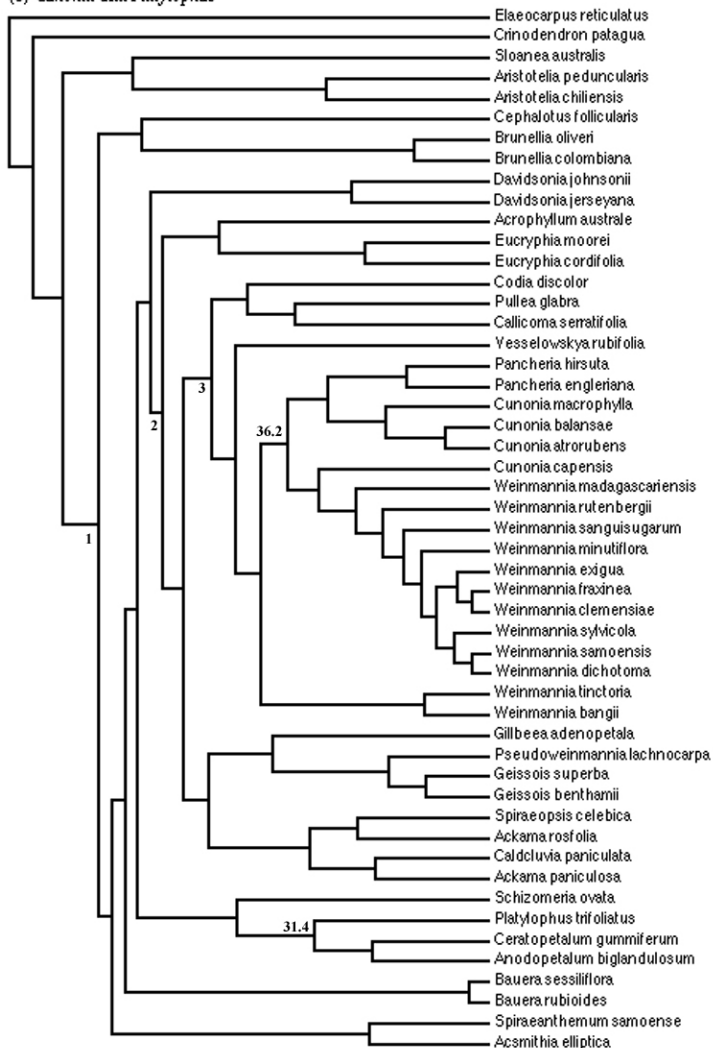

(c) *Curtisia-Grubbia*

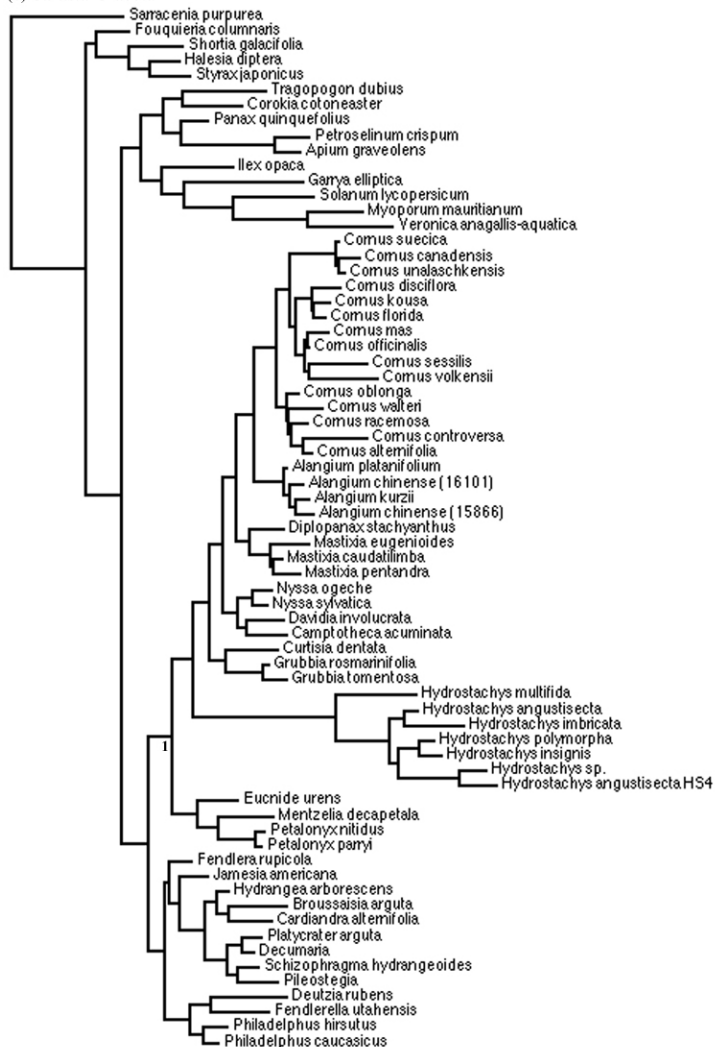

(d) *Gunnera*

43.7-86.8

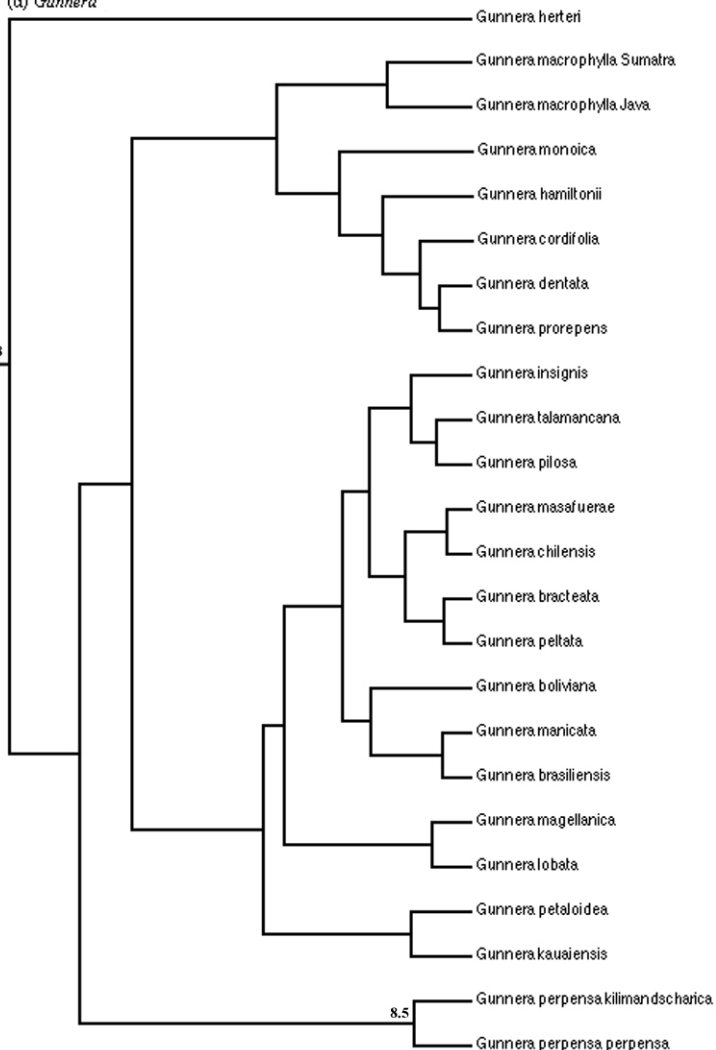

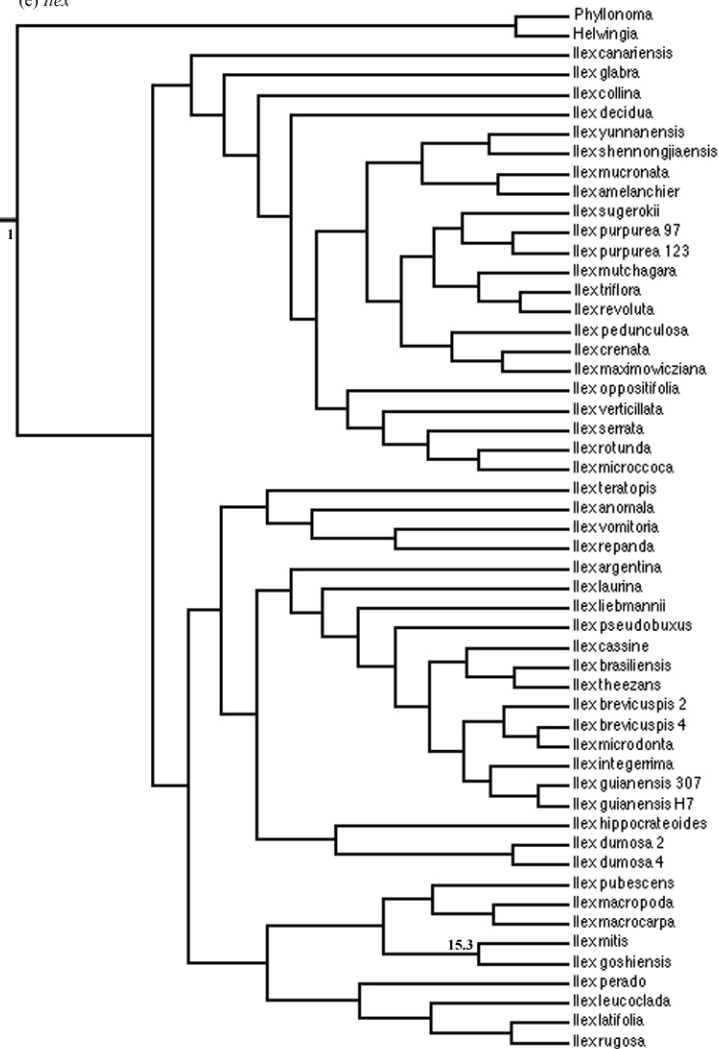

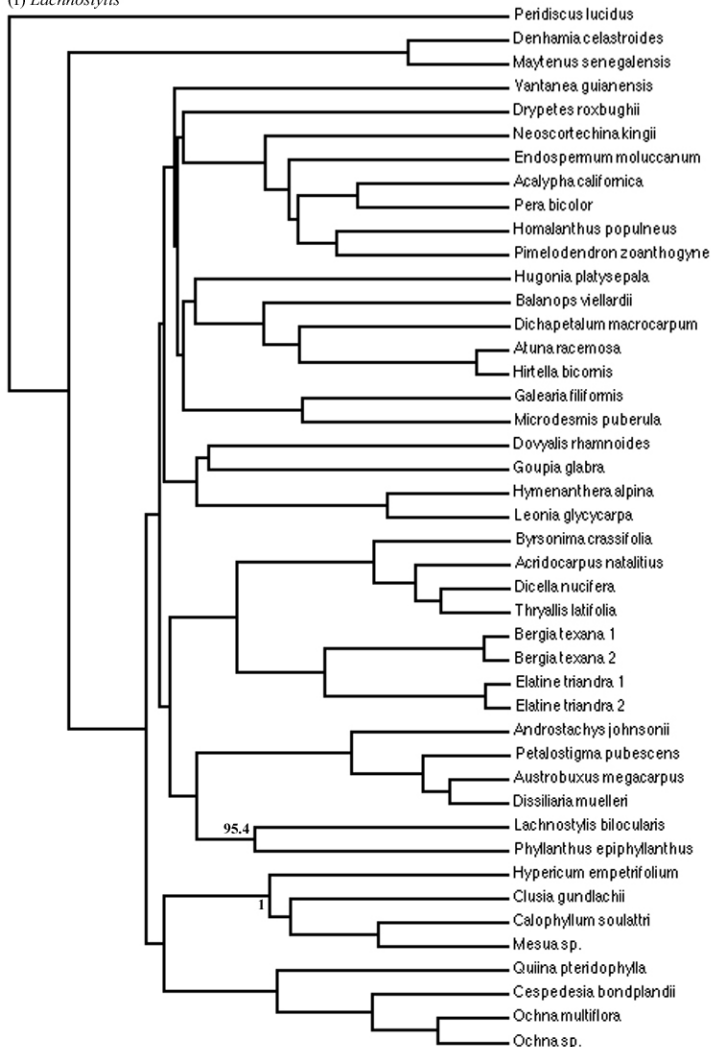

(g) *Metrosideros*

18.8

*Cloezia floribunda*  
*Metrosideros angustifolia*  
*Metrosideros albiflora*  
*Metrosideros halconensis*  
*Metrosideros whitiana*  
*Metrosideros salomonensis*  
*Metrosideros ovata*  
*Metrosideros ramiflora*  
*Metrosideros umbellata*  
*Metrosideros oreomytus*  
*Metrosideros robusta*  
*Metrosideros bartlettii*  
*Metrosideros collina* var. *villosa*  
*Metrosideros polymorpha* 54  
*Metrosideros polymorpha* var. *dieteri*  
*Metrosideros waiialealae*  
*Metrosideros collina* var. *collina* 39  
*Metrosideros tremuloides*  
*Metrosideros polymorpha* var. *incana*  
*Metrosideros polymorpha* *glaberrima*  
*Metrosideros collina* *collina* 41  
*Metrosideros nervulosa*  
*Metrosideros excelsa*  
*Metrosideros polymorpha* 53  
*Metrosideros macropus*  
*Metrosideros sclerocarpa*  
*Metrosideros kemadecensis*  
*Metrosideros rugosa*  
*Metrosideros* sp.  
*Metrosideros collina* var. *collina* 35  
*Metrosideros collina* var. *collina* 57  
*Metrosideros collina* var. *fruticosa* 56  
*Metrosideros collina* var. *collina* 37  
*Metrosideros gregoryi*  
*Metrosideros solomonensis*  
*Metrosideros boninensis*  
*Metrosideros ochrantha*  
*Metrosideros chemeri*  
*Metrosideros engleriana*  
*Metrosideros nitida*  
*Metrosideros microphylla*  
*Metrosideros tetrasticha*  
*Metrosideros humboldtia*  
*Metrosideros punctata*  
*Metrosideros parkinsonii*  
*Metrosideros whitakeri*  
*Metrosideros brevistylis*  
*Metrosideros longipetiolata*  
*Metrosideros dolichandra*  
*Metrosideros porphyrea*  
*Metrosideros rotundifolia*  
*Metrosideros paniensis*  
*Metrosideros cacuminum*  
*Metrosideros operculata*  
*Metrosideros patens*  
*Metrosideros caminea*  
*Metrosideros fulgens*  
*Metrosideros colensoi*  
*Metrosideros diffusa*  
*Metrosideros perforata*



(h) *Ocotea*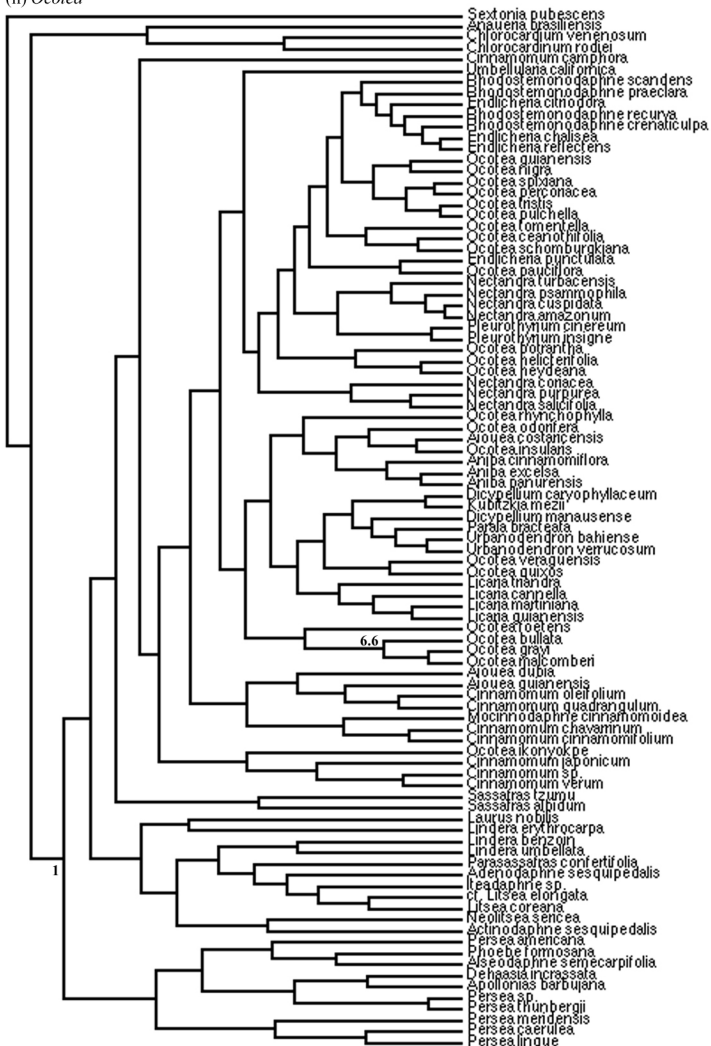



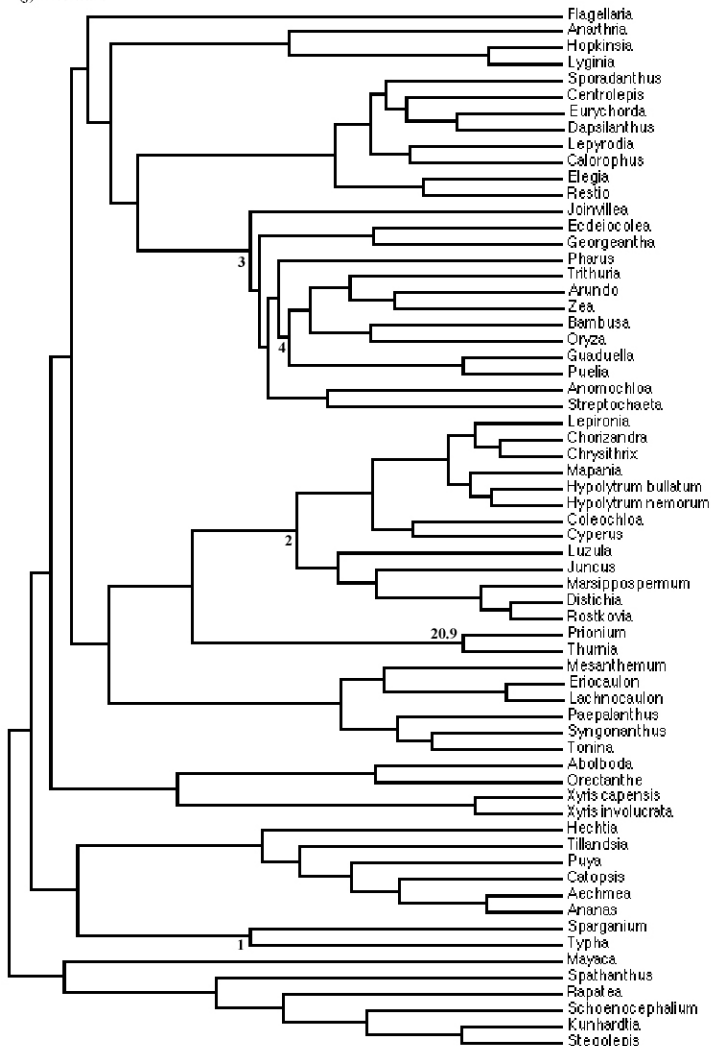

(k) *Roridula*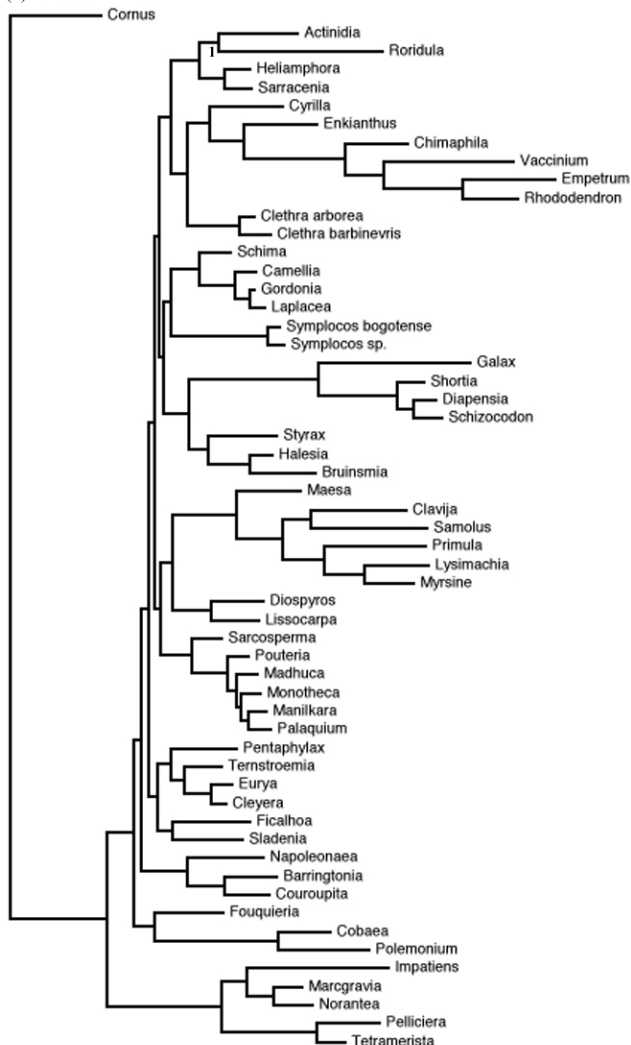

1) *Smelophyllum*

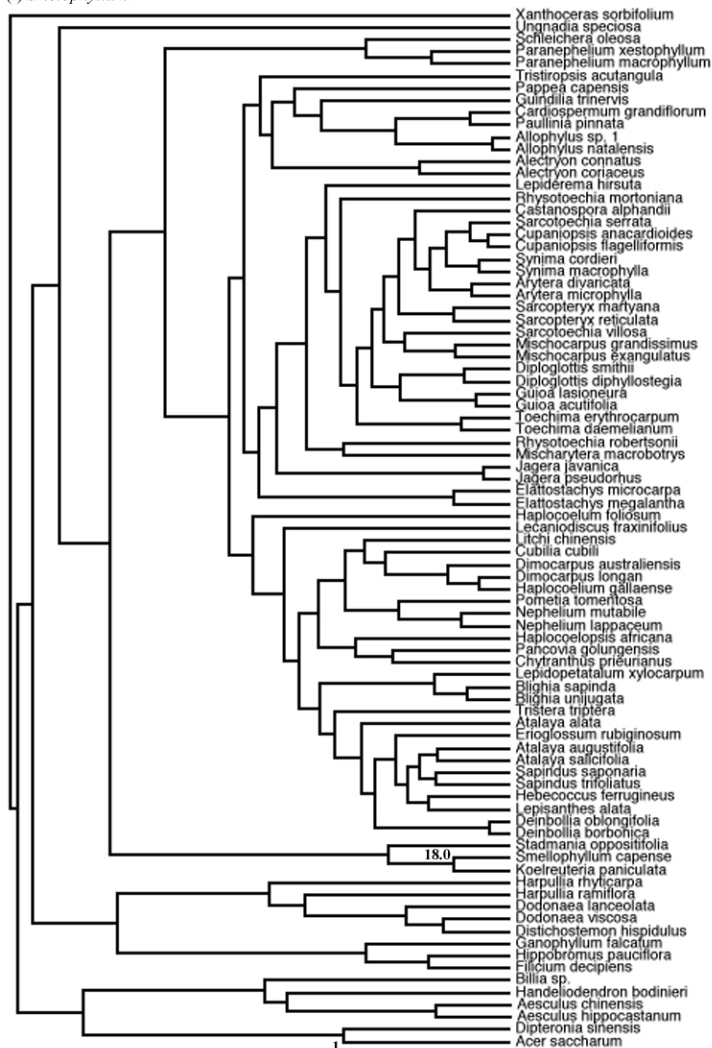

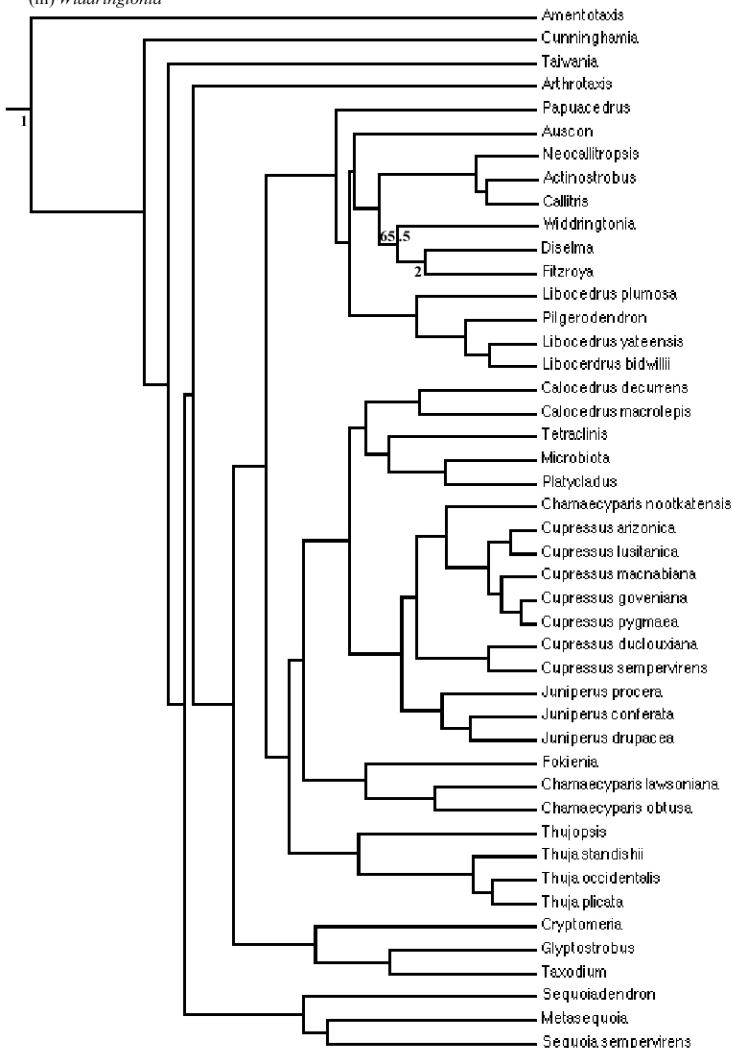

Supplement: rspb20063560s07.pdf [file rspb20063560s07.pdf]
