# Supplementary material
Source: PubMed Central journal article supplement (PMC1635518)
Supplement: rspb20063560s05.pdf [file rspb20063560s05.pdf]

**A. Sequence datasets and fossils used in phylogeny construction and calibration. F, Node age fixed to minimum age of fossil; L, Lower bound for node age set to minimum age of fossil. Redundant calibration points provide extra support for the calibration points in use. \*Calibration point is redundant because a nested node can be dated at the same or older date. \*\*Calibration point is redundant because the node is the same as the one used above, and the fossil is the same age or younger than the fossil above.**

| putative relict                                  | dataset                                        | gene regions                | calibration no. | taxon to which fossil associated, with taxon identification in parentheses if different from the former | fossil type          | fossil date and minimum age (Myr before present) | reference(s)                                                    | supported node taxon 1 | calibrated taxon 2  | constraint on node age |
|--------------------------------------------------|------------------------------------------------|-----------------------------|-----------------|---------------------------------------------------------------------------------------------------------|----------------------|--------------------------------------------------|-----------------------------------------------------------------|------------------------|---------------------|------------------------|
| <i>Brabejum stellatifolium</i><br>Proteaceae     | Hoot & Douglas (1998) <sup>a</sup>             | atpB                        | 1               | Proteaceae ( <i>Triorites africaensis</i> )                                                             | Pollen               | Cenomanian 93.5                                  | Herngreen (1973), Ward & Doyle (1994)                           | <i>Brabejum</i>        | <i>Platanus</i>     | F                      |
|                                                  |                                                |                             | 2               | <i>Adenanthos</i>                                                                                       | Pollen               | Campanian 70.6                                   | Dettmann (1994), Dettmann & Jarzen (1991)                       | <i>Adenanthos</i>      | <i>Protea</i>       | L                      |
|                                                  |                                                |                             | 3               | <i>Stirlingia</i>                                                                                       | Pollen               | Campanian 70.6                                   | Dettmann (1994), Dettmann & Jarzen (1991)                       | <i>Stirlingia</i>      | <i>Cenarrhenes</i>  | L                      |
|                                                  |                                                |                             | 4               | <i>Telopea</i>                                                                                          | Pollen               | Campanian 70.6                                   | Dettmann (1994), Dettmann & Jarzen (1991)                       | <i>Telopea</i>         | <i>Alloxylon</i>    | L                      |
|                                                  |                                                |                             | 5               | <i>Grevillea</i>                                                                                        | Pollen               | Maastrichtian 65.5                               | Dettmann (1994), Dettmann & Jarzen (1991)                       | <i>Grevillea</i>       | <i>Buckinghamia</i> | L                      |
|                                                  |                                                |                             | 6               | <i>Beauprea</i>                                                                                         | Pollen               | Campanian 70.6                                   | Dettmann (1994), Dettmann & Jarzen (1991)                       | <i>Beauprea</i>        | <i>Cenarrhenes</i>  | *                      |
|                                                  |                                                |                             | 7               | <i>Camarvonnia</i>                                                                                      | Pollen               | Campanian 70.6                                   | Dettmann (1994), Dettmann & Jarzen (1991)                       | <i>Camarvonnia</i>     | <i>Bellendena</i>   | *                      |
|                                                  |                                                |                             | 8               | <i>Knightia</i>                                                                                         | Pollen               | Campanian 70.6                                   | Dettmann (1994), Dettmann & Jarzen (1991)                       | <i>Knightia</i>        | <i>Bellendena</i>   | *                      |
| <i>Cunonia capensis</i><br>Cunoniaceae           | Bradford & Barnes (2001)                       | trnL-trnF                   | 1               | Cunoniaceae                                                                                             | Flowers              | Campanian 70.6                                   | Schönenberger <i>et al.</i> (2001), Crepet <i>et al.</i> (2004) | <i>Brunellia</i>       | <i>Cunonia</i>      | F                      |
|                                                  |                                                |                             | 2               | <i>Eucryphia</i>                                                                                        | Compound leaves      | Paleocene 55.8                                   | Barnes & Jordan (2000)                                          | <i>Eucryphia</i>       | <i>Ackama</i>       | L                      |
|                                                  |                                                |                             | 3               | <i>Callicoma</i>                                                                                        | Leaves               | Oligocene 23.03                                  | Barnes & Hill (1999)                                            | <i>Callicoma</i>       | <i>Cunonia</i>      | L                      |
|                                                  |                                                |                             | 4               | <i>Codia</i>                                                                                            | Leaves               | Oligocene 23.03                                  | Barnes & Hill (1999)                                            | <i>Codia</i>           | <i>Cunonia</i>      | **                     |
| <i>Curtisia dentata</i><br>Cornaceae             | Fan & Xiang (2003)                             | 26S                         | 1               | <i>Nyssa-Mastixia</i> group                                                                             | 3D Fruits & perianth | Early Coniacian 89                               | Takahashi <i>et al.</i> (2002), Bremer <i>et al.</i> (2004)     | <i>Curtisia</i>        | <i>Petalonyx</i>    | F                      |
| <i>Gunnera perpensa</i><br>Gunneraceae           | Wanntorp <i>et al.</i> (2002) <sup>o</sup>     | ITS, rbcL, & rps16          | 1               | <i>Gunnera</i> ( <i>Tricolpites reticulatus</i> )                                                       | Pollen               | Albian 99.6                                      | Brenner (1968), Jarzen (1980)                                   | <i>Gunnera</i>         | <i>Myrothamnus</i>  | F                      |
| <i>Ilex mitis</i><br>Aquifoliaceae               | Manen <i>et al.</i> (2002) <sup>c</sup>        | atpB-rbcL, trnL-trnF & rbcL | 1               | <i>Ilex</i>                                                                                             | Pollen               | Cenomanian 93.5                                  | Bolchovitina (1953), Martin (1977)                              | <i>Ilex</i>            | <i>Phyllonoma</i>   | F                      |
| <i>Lachnostylis bilocularis</i><br>Euphorbiaceae | Davis & Chase (2004)                           | PHYC, ndhF & rbcL           | 1               | Clusiaceae                                                                                              | Flower               | Turonian 89.3                                    | Crepet & Nixon (1998), Crepet <i>et al.</i> (2004)              | <i>Clusia</i>          | <i>Hypericum</i>    | F                      |
| <i>Metrosideros angustifolia</i><br>Myrtaceae    | Wright <i>et al.</i> (2000, 2003) <sup>d</sup> | ITS                         | 1               | <i>Metrosideros</i>                                                                                     | Leaf                 | Otaian (Early Miocene) 21                        | Pole (1993), D.C. Mildenhall pers. comm.                        | <i>Metrosideros</i>    | <i>Cloezia</i>      | F                      |
| <i>Ocotea bullata</i><br>Lauraceae               | Chanderbali <i>et al.</i> (2001)               | ITS                         | 1               | <i>Persea</i> group & Cinnamomeae                                                                       | Flowers              | Eocene 33.9                                      | Taylor (1988), Chanderbali <i>et al.</i> (2001)                 | <i>Ocotea</i>          | <i>Persea</i>       | F                      |

|                                               |                                             |                                 |   |                                   |                                     |                    |                                                                 |                      |                      |    |
|-----------------------------------------------|---------------------------------------------|---------------------------------|---|-----------------------------------|-------------------------------------|--------------------|-----------------------------------------------------------------|----------------------|----------------------|----|
| <i>Platylophus trifoliatus</i><br>Cunoniaceae | Bradford & Barnes (2001)                    | trnL-trnF                       | 1 | Cunoniaceae                       | Flowers                             | Campanian 70.6     | Schönenberger <i>et al.</i> (2001), Crepet <i>et al.</i> (2004) | <i>Brunellia</i>     | <i>Cunonia</i>       | F  |
|                                               |                                             |                                 | 2 | <i>Eucryphia</i>                  | Compound leaves                     | Paleocene 55.8     | Barnes & Jordan (2000)                                          | <i>Eucryphia</i>     | <i>Ackama</i>        | L  |
|                                               |                                             |                                 | 3 | <i>Callicoma</i>                  | Leaves                              | Oligocene 23.03    | Barnes & Hill (1999)                                            | <i>Callicoma</i>     | <i>Cunonia</i>       | L  |
|                                               |                                             |                                 | 4 | <i>Codia</i>                      | Leaves                              | Oligocene 23.03    | Barnes & Hill (1999)                                            | <i>Codia</i>         | <i>Cunonia</i>       | ** |
| <i>Podocarpus latifolius</i><br>Podocarpaceae | Conran <i>et al.</i> (2000) <sup>e</sup>    | rbcL                            | 1 | <i>Dacrydium</i>                  | Pollen                              | Turonian 89.3      | Dettmann <i>et al.</i> (1992)                                   | <i>Dacrydium</i>     | <i>Falcatifolium</i> | F  |
|                                               |                                             |                                 | 2 | <i>Nageia</i>                     | Leafy branches, leaves & seeds      | Barremian 125.0    | Kimura <i>et al.</i> (1988)                                     | <i>Nageia</i>        | <i>Retrophyllum</i>  | F  |
|                                               |                                             |                                 | 3 | <i>Lagarostrobos</i>              | Pollen                              | Turonian 89.3      | Dettmann <i>et al.</i> (1992)                                   | <i>Lagarostrobos</i> | <i>Manoao</i>        | F  |
|                                               |                                             |                                 | 4 | <i>Dacrycarpus</i>                | Pollen                              | Santonian 83.5     | Dettmann <i>et al.</i> (1992)                                   | <i>Dacrycarpus</i>   | <i>Dacrydium</i>     | *  |
| <i>Prionium serratum</i><br>Prioniaceae       | Bremer (2002)                               | rbcL                            | 1 | <i>Typha</i>                      | Fruit                               | Maastrichtian 65.5 | Knobloch & Mai (1986), Bremer (2002)                            | <i>Typha</i>         | <i>Sparganium</i>    | F  |
|                                               |                                             |                                 | 2 | Cyperaceae                        | Fruit                               | Paleocene 55.8     | Mai (1987), Bremer (2002)                                       | <i>Luzula</i>        | <i>Chorizandra</i>   | F  |
|                                               |                                             |                                 | 3 | Poaceae ( <i>Monoporites</i> )    | Pollen                              | Maastrichtian 65.5 | van der Hammen (1954), Linder (1987), Bremer (2002)             | <i>Joinvillea</i>    | <i>Georgeantha</i>   | F  |
|                                               |                                             |                                 | 4 | BEP & PACCAD Poaceae clades       | Spikelets & inflorescence fragments | Paleocene 55.8     | Crepet & Feldman (1991), GPWG (2001), Bremer (2002)             | <i>Puelia</i>        | <i>Oryza</i>         | L  |
|                                               |                                             |                                 | 5 | Restionaceae ( <i>Milfordia</i> ) | Pollen                              | Maastrichtian 65.5 | van der Hammen (1954), Elisik (1968), Bremer (2002)             | <i>Restio</i>        | <i>Anarthria</i>     | *  |
| <i>Roridula gorgonias</i><br>Actinidiaceae    | Anderberg <i>et al.</i> (2002) <sup>f</sup> | atp1, atpB, ndhF<br>matR & rbcL | 1 | <i>Saurauia</i>                   | Seeds                               | Turonian 89.3      | Knobloch & Mai (1986), Bremer <i>et al.</i> (2004)              | <i>Roridula</i>      | <i>Actinidia</i>     | F  |
| <i>Smelophyllum capense</i><br>Sapindaceae    | Harrington <i>et al.</i> (2005)             | matK                            | 1 | <i>Acer</i>                       | Leaf                                | Early Eocene 53.3  | Wolfe & Tanai (1987), Triplehorn <i>et al.</i> (1984)           | <i>Acer</i>          | <i>Dipteronia</i>    | F  |
| <i>Widdringtonia</i><br>Cupressaceae s.l.     | Gadek <i>et al.</i> (2000)                  | matK                            | 1 | Cupressaceae s. <i>lat.</i>       | Seed cones                          | Anisian 237.0      | Yao <i>et al.</i> (1997), Stockey <i>et al.</i> (2005)          | <i>Amentotaxis</i>   | <i>Cunninghamia</i>  | F  |
|                                               |                                             |                                 | 2 | <i>Fitzroya</i>                   | Leafy twigs                         | Mid-Lutetian 47.46 | Berry (1938), Wilf <i>et al.</i> (2005)                         | <i>Fitzroya</i>      | <i>Diselma</i>       | L  |

<sup>a</sup>*Nelumbo lutea* added as outgroup (AF093387).

<sup>b</sup>*Paeonia* added as outgroup (AY328313, AJ430201 and AJ402982). The ITS region was unavailable for *Myrothamnus*, and multidivtime requires that each gene must be sampled for at least one taxon from each of the two lineages that emanate from the ingroup root. We therefore dated the basal *Gunnera* divergence between *G. herteri* and the rest of the genus based on the Bayesian three-gene topology and branch lengths from rbcL and rps16, using the Albian fossil to calibrate the *Gunnera-Myrothamnus* divergence. Maximum and minimum credibility intervals for the basal *Gunnera* divergence were then used to calibrate a Bayesian ITS tree.

<sup>c</sup>*Sambucus* added as outgroup (AF446988, AF446928 and AF366929).

<sup>d</sup>*Anetholea anisata* added as outgroup (AY187225).

<sup>e</sup>Sampling follows Conran *et al.* (2000) except that *Cephalotaxus* was represented by AF227461, and *Taxodium distichum* by AF127427.

<sup>f</sup>A Bayesian tree based on Anderberg *et al.*'s (2002) five-gene dataset with wide sampling supports a sister relationship between *Roridula gorgonias* and *Actinidia* (100% Bayesian branch support). A Bayesian tree based on the following rbcL sequences supports the monophyly of the Actinidiaceae (*Actinidia*, *Saurauia* and *Clematocletha*, 100% Bayesian branch support) sister to *Roridula*. *Actinidia*: L01882, AJ549049, AJ549070, AJ549042, AJ549071 and AJ549064. *Clematocletha*: Z80172. *Saurauia*: Z83147, AJ549074 and AF088852. *Roridula gorgonias*: L01950. Outgroups: L01952 and L02433.

- Anderberg, A. A., Rydin, C. & Källersjö, M. 2002 Phylogenetic relationships in the order Ericales s.l.: analyses of molecular data from five genes from the plastid and mitochondrial genomes. *Am. J. Bot.* 89, 677–687.
- Barnes, R.W. & Hill, R. S. 1999 Macrofossils of *Callicoma* and *Codia* (Cunoniaceae) from Australian Cainozoic sediments. *Aust. Syst. Bot.* 12, 647–670. (doi:10.1071/SB98016)
- Barnes, R. W. & Jordan, G. J. 2000 *Eucryphia* (Cunoniaceae) reproductive and leaf macrofossils from Australian Cainozoic sediments. *Aust. Syst. Bot.* 13, 373–394. (doi:10.1071/SB99004)
- Berry, E. W. 1938 Tertiary flora from the Río Pichileufú, Argentina. *Geol. Soc. Am. Spec. Pap.* 12, 1–149.
- Bolchovitina, N. A. 1953 Spore pollen characteristics of Cretaceous deposits of central regions of U.S.S.R.. *Trudy Instituta Geologicheskikh Nauk* 145, 1–183. [In Russian.]
- Bradford, J. C. & Barnes, R. W. 2001 Phylogenetics and classification of Cunoniaceae (Oxalidales) using chloroplast DNA sequences and morphology. *Syst. Biol.* 26, 354–385.
- Bremer, K. 2002 Gondwanan evolution of the grass alliance of families (Poales). *Evolution* 56, 1374–1387.
- Bremer, K., Friis, E. M. & Bremer, B. 2004 Molecular phylogenetic dating of Asterid flowering plants shows early Cretaceous diversification. *Syst. Biol.* 53, 496–505. (doi:10.1080/10635150490445913)
- Brenner, G. J. 1968 Middle Cretaceous spores and pollen from northeastern Peru. *Pollen et Spores* 10, 341–383.
- Chanderbali, A. S., van der Werff, H. & Renner, S. S. 2001 Phylogeny and historical biogeography of Lauraceae: evidence from the chloroplast and nuclear genomes. *Ann. MO Bot. Gard.* 88, 104–134.
- Conran, J. G., Wood, G. M., Martin, P. G., Dowd, J. M., Quinn, C. J., Gadek, P. A. & Price, R. A. 2000 Generic relationships within and between the gymnosperm families Podocarpaceae and Phyllocladaceae based on an analysis of the chloroplast gene *rbcL*. *Aust. J. Bot.* 48, 715–724. (doi:10.1071/BT99062)
- Crepet, W. L. & Feldman, G. D. 1991 The earliest remains of grasses in the fossil record. *Am. J. Bot.* 78, 1010–1014.
- Crepet, W. L. & Nixon, K. C. 1998 Fossil Clusiaceae from the Late Cretaceous (Turonian) of New Jersey and implications regarding the history of bee pollination. *Am. J. Bot.* 85, 1122–1133.
- Crepet, W. M., Nixon, K. C. & Gandolfo, M. A. 2004 Fossil evidence and phylogeny: the age of major angiosperm clades based on mesofossil and macrofossil evidence from Cretaceous deposits. *Am. J. Bot.* 91, 1666–1682.
- Davis, C. C. & Chase, M. W. 2004 Elatinaceae are sister to Malpighiaceae; Peridiscaceae belong to Saxifragales. *Am. J. Bot.* 91, 262–273.
- Dettmann, M. E. 1994 Cretaceous vegetation: the microfossil record. In *History of the Australian vegetation: Cretaceous to recent* (ed. R. S. Hill), pp. 143–170. Cambridge, UK: Cambridge University Press.
- Dettmann, M. E. & Jarzen, D. M. 1991 Pollen evidence for Late Cretaceous differentiation of Proteaceae in southern polar forests. *Can. J. Bot.* 69, 901–906.

- Dettmann, M. E. *et al.* 1992 Australian Cretaceous terrestrial faunas and floras: biostratigraphic and biogeographic implications. *Cretaceous Res.* 13, 207–262. (doi:10.1016/0195-6671(92)90001-7)
- Elsik, W. C. 1968 Palynology of a Paleocene Rockdale lignite, Milam County, Texas. I. Morphology and taxonomy. *Pollen et Spores* 10, 263–314.
- Fan, C. & Xiang, Q. Y. 2003 Phylogenetic analyses of Cornales based on 26S rRNA and combined 26S *rDNA-matK-rbcL* sequence data. *Am. J. Bot.* 90, 1357–1372.
- Gadek, P. A., Alpers, D. L., Heslewood, M. M. & Quinn, C. J. 2000 Relationships within Cupressaceae *sensu lato*: a combined morphological and molecular approach. *Am. J. Bot.* 87, 1044–1057.
- Grass Phylogeny Working Group 2001 Phylogeny and subfamilial classification of the grasses (Poaceae). *Ann. Mo. Bot. Gard.* 88, 373–457.
- Harrington, M. G., Edwards, K. J., Johnson, S. A., Chase, M. W. & Gadek, P. A. 2005 Phylogenetic inference in Sapindaceae *sensu lato* using plastid *matK* and *rbcL* DNA sequences. *Syst. Bot.* 30, 366–382. (doi:10.1600/0363644054223549)
- Herngreen, G. F.W. 1973 Palynology of Albian–Cenomanian strata of borehole 1-QS-1-MA, state of Maranhão, Brazil. *Pollen et Spores* 15, 515–555.
- Hoot, S. B. & Douglas, A. W. 1998 Phylogeny of the Proteaceae based on *atpB* and *atpB-rbcL* intergenic spacer region sequences. *Aust. Syst. Bot.* 11, 301–320. (doi:10.1071/SB98027)
- Jarzen, D. M. 1980 The occurrence of *Gunnera* pollen in the fossil record. *Biotropica* 12, 117–123.
- Kimura, T., Ohana, T. & Mimoto, K. 1988 Discovery of a Podocarpaceous plant from the Lower Cretaceous of Kochi Prefecture, in the Outer Zone of Southwest Japan. *Proc. Jpn Acad. Ser. B* 64, 213–216.
- Knobloch, E. & Mai, D. H. 1986 Monographie der früchte und samen in der Kreide von Mitteleuropa. *Edice Rozpravy ústředního ústavu geologického* 47, 1–219.
- Linder, H. P. 1987 The evolutionary history of the Poales/Restionales—a hypothesis. *Kew Bull.* 42, 297–318.
- Mai, D. H. 1987 Neue früchte und samen aus paläozänen ablagerungen Mitteleuropas. *Fed. Rep.* 98, 197–229.
- Manen, J. F., Boulter, M. C. & Naciri-Graven, Y. 2002 The complex history of the genus *Ilex* L. (Aquifoliaceae): evidence from the comparison of plastid and nuclear DNA sequences and from fossil data. *Plant Syst. Evol.* 235, 79–98. (doi:10.1007/s00606-002-0225-x)
- Martin, H. A. 1977 The history of *Ilex* (Aquifoliaceae). *Aust. J. Bot.* 25, 655–673. (doi:10.1071/BT9770655)
- Pole, M. 1993 Early Miocene flora of the Manuherikia group, New Zealand. 7. Myrtaceae, including *Eucalyptus*. *J. R. Soc. NZ* 23, 313–328.

- Schönenberger, J., Friis, E. M., Matthews, M. L. & Endress, P. K. 2001 Cunoniaceae in the Cretaceous of Europe: evidence from fossil flowers. *Ann. Bot.* 88, 423–437. (doi:10.1006/anbo.2001.1488)
- Stockey, R. A., Kvaček, J., Hill, R. S., Rothwell, G. W. & Kvaček, Z. 2005 The fossil record of Cupressaceae *s. lat.* In *A monograph of Cupressaceae and Sciadopitys* (ed. A. Farjon), pp. 54–68. Kew, UK: Royal Botanic Gardens.
- Takahashi, M., Crane, P. R. & Manchester, S. R. 2002 *Hironoia fusiformis* gen. et sp. nov.: a cornelian fruit from the Kamikitaba locality (Upper Cretaceous, Lower Coniacian) in northeastern Japan. *J. Plant Res.* 115, 463–473. (doi:10.1007/s10265-002-0062-6)
- Taylor, D. W. 1988 Eocene floral evidence of Lauraceae: corroboration of the North American megafossil record. *Am. J. Bot.* 75, 948–957.
- Triplehorn, D. M., Turner, D. L. & Naeser, C. W. 1984 Radiometric age of the Chickaloon Formation of southcentral Alaska: location of the Paleocene–Eocene boundary. *Geol. Soc. Am. Bull.* 95, 740–742. (doi:10.1130/0016-7606(1984)95!740:RAOTCFO2.0.CO;2)
- van der Hammen, T. 1954 El desarrollo de la flora Colombiana en los períodos geológicos. I. Maestrichtiano hasta terciario más inferior. *Boletín Geológico, Bogotá* 2, 49–106.
- Wanntorp, L., Wanntorp, H. E. & Källersjö, M. 2002 Phylogenetic relationships of *Gunnera* based on nuclear ribosomal DNA ITS region, rbcL and rps16 intron sequences. *Syst. Biol.* 27, 512–521.
- Ward, J. V. & Doyle, J. A. 1994 Ultrastructure and relationships of mid-Cretaceous polyforate and trifoliate pollen from Northern Gondwana. In *Ultrastructure of fossil spores and pollen* (ed. M. H. Kurmann & J. A. Doyle), pp. 161–172. Kew, UK: Royal Botanic Gardens.
- Wilf, P., Johnson, K. R., Cúneo, N. R., Smith, M. E., Singer, B. S. & Gandolfo, M. A. 2005 Eocene Plant Diversity at Laguna del Hunco and Río Pichileufú, Patagonia, Argentina. *Am. Nat.* 165, 634–650. (doi:10.1086/430055)
- Wolfe, J. A. & Tanai, T. 1987 Systematics, phylogeny, and distribution of *Acer* (Maples) in the Cenozoic of western North America. *J. Fac. Sci. Hokkaido Univ. Ser. IV* 22, 1–246.
- Wright, S. D., Yong, C. G., Dawson, J.W., Whittaker, D. J. & Gardner, R. C. 2000 Riding the ice age El Niño? Pacific biogeography and evolution of *Metrosideros* subg. *Metrosideros* (Myrtaceae) inferred from nuclear ribosomal DNA. *Proc. Natl Acad. Sci. USA* 97, 4118–4123. (doi:10.1073/pnas.050351197)
- Wright, S. D., Gray, R. D. & Gardner, R. C. 2003 Energy and the rate of evolution: inferences from plant rDNA substitution rates in the western Pacific. *Evolution* 57, 2893–2898.
- Yao, X., Taylor, T. N. & Taylor, E. L. 1997 A taxodiaceous seed cone from the Triassic of Antarctica. *Am. J. Bot.* 84, 343–354.
