# Supplementary material
Source: PubMed Central journal article supplement (PMC1635518)
Supplement: rspb20063560s06.pdf [file rspb20063560s06.pdf]

**B: Formulae used in the calculation of diversification rates and 95% confidence intervals of expected diversity according to the age of a group.**

To estimate the rate of diversification,  $r$ , of a Cape radiations we followed Magallón & Sanderson's (2001) method-of-moments estimator based on the standing diversity of the clade,  $n$ , and its age,  $t$ . Relative extinction rate,  $\varepsilon$ , is also incorporated, and is defined as:

$$\varepsilon = \frac{\mu}{\lambda} \quad (1)$$

where  $\lambda$  and  $\mu$  are constant speciation and extinction rates respectively.

The estimated rate for a dated stem group is given by:

$$\hat{r}_\varepsilon = \frac{1}{t} \log[n(1-\varepsilon) + \varepsilon] \quad (2)$$

and for a dated crown group by:

$$\hat{r}_\varepsilon = \frac{1}{t} \left\{ \log \left[ \frac{1}{2} n (1 - \varepsilon^2) + 2\varepsilon + \frac{1}{2} (1 - \varepsilon) \sqrt{n(n\varepsilon^2 - 8\varepsilon + 2n\varepsilon + n)} \right] - \log 2 \right\}. \quad (3)$$

Minimum duration of Cape presence of putative relicts was estimated from the timing of divergence of these lineages from their closest non-Cape relatives, corresponding to their stem node ages. For a dated stem group, Strathmann & Slatkin (1983) showed that the combined probability of having  $k$  or more species at time  $t$  is

$$P[N(t) \geq k] = \beta_t^{k-1} \quad (4)$$

and the combined probability of having fewer than  $k$  species at  $t$  is

$$P[N(t) < k] = 1 - \beta_t^{k-1} \quad (5)$$

where  $\beta_t$  is a parameter which depends on time (Magallon & Sanderson 2001):

$$\beta_t = \frac{e^{rt} - 1}{e^{rt} - \varepsilon}. \quad (6)$$

The sum of these two combined probabilities is one. Equations (4) and (5) were used to obtain critical values of  $k$  above and below which 5% of replicates of the stochastic process are expected to fall. To obtain a 95% confidence interval on a clade at time  $t$  with diversity  $N(t)$  given a diversification rate,  $r$ , and relative extinction rate,  $\epsilon$ , an upper boundary value,  $k_u$ , was calculated at or below which 97.5% of the results of the replicates of the stochastic process will fall, and a lower boundary value  $k_l$ , above which 97.5% of the results of the replicates of the stochastic process will fall. Values of  $k_u$  for every 0.1 Ma time interval from  $t = 0$  to  $t = 100$  Ma were obtained by fixing equation (4) to be equal to 0.025. Likewise, values for  $k_l$  were obtained by fixing equation (5) to be equal to 0.025. For the relative extinction rate,  $\epsilon$ , a value of zero, implying no extinction forms the lower bound. We follow Magallón & Sanderson (2001) in somewhat arbitrarily choosing 0.9 as an upper bound on the relative extinction rate since at values above  $\epsilon = 0.9$ , “estimated values of  $\lambda$  and  $\mu$  begin to exceed 1.0 events per million years, which is approximately the upper limit estimated from real data from a variety of taxa..”.

- Magallón, S. & Sanderson, M. J. 2001 Absolute diversification rates in angiosperm clades. *Evolution* **55**, 1762-1780.
- Strathmann, R. R. & Slatkin, M. 1983 The improbability of animal phyla with few species. *Paleobiology* **9**, 97-106.
